# Supplementary material
Source: PubMed Central journal article supplement (PMC6405976)
Supplement: ajcr0009-0270-f9.pdf [file ajcr0009-0270-f9.pdf]

# DANCR/miR-138/Sox4 promotes NSCLC progression

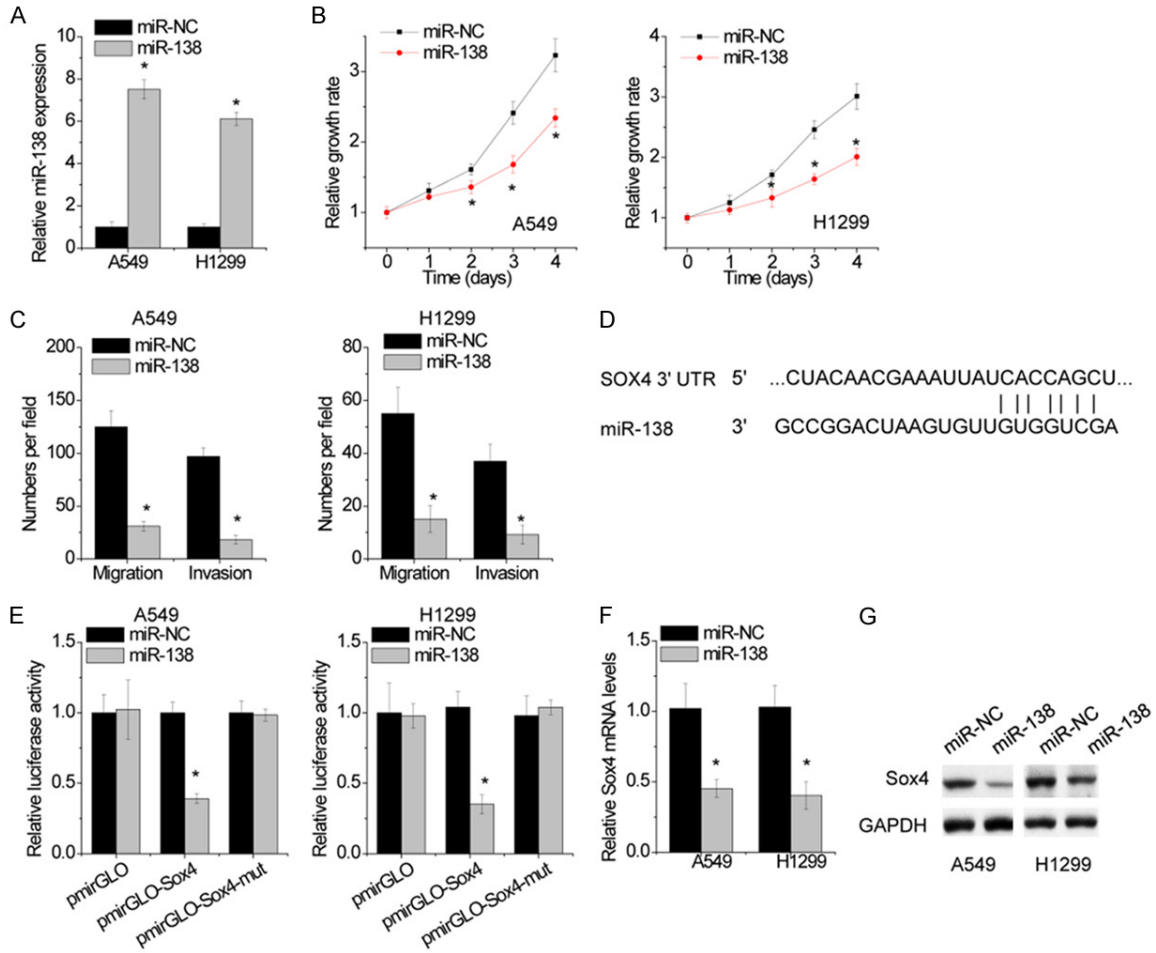

**Figure S1.** Sox4 is suppressed by miR-138. A. A549 and H1299 cells were transfected with miR-NC or miR-138 mimics. B. The proliferation of A549 and H1299 cells with miR-138 overexpression was detected by CCK-8 assay. C. The migration and invasion of A549 and H1299 cells with miR-138 overexpression was detected by Transwell assay. D. Schematic representation of the miR-138 site in Sox4 3'UTR. E. Luciferase activity in A549 and H1299 cells cotransfected with miR-NC or miR-138 and luciferase reporters containing Sox4 or mutant Sox4 3'UTR (Sox4-mut). Data are presented as the relative ratio of firefly luciferase activity to renilla luciferase activity. F. The Sox4 mRNA levels in A549 and H1299 cells with miR-138 overexpression were assessed by qRT-PCR. G. The Sox4 protein levels in A549 and H1299 cells with miR-138 overexpression was assessed by western blot. Data are presented as the means  $\pm$  SD. \* $P < 0.05$ .
